# Supplementary material
Source: PubMed Central journal article supplement (PMC3659929)
Supplement: supp_2012.077446_2012_077446-Contributions.pdf [file supp_2012.077446_2012_077446-Contributions.pdf]

**Manuscript no. HAEMATOL/2012/077446 entitled “Inappropriately low hepcidin levels in patients with myelodysplastic syndrome carrying a somatic mutation of SF3B1”**

**Authors: Ilaria Ambaglio, Luca Malcovati, Elli Papaemmanuil, Coby M. Laarakkers, Matteo G. Della Porta, Anna Galli, Matteo C. Da Vià, Elisa Bono, Marta Ubezio, Erica Travaglino, Riccardo Albertini, Peter J. Campbell, Dorine W. Swinkels, and Mario Cazzola**

**Information about the contributions of each person named as having participated in the study**

**1) Guarantor(s), i.e., person(s) who is (are) responsible for the integrity of the work as a whole:**

- Luca Malcovati, Department of Hematology Oncology, Fondazione IRCCS Policlinico San Matteo, Pavia, Italy; Department of Molecular Medicine, University of Pavia, Italy. E-mail: [luca.malcovati@unipv.it](mailto:luca.malcovati@unipv.it)
- Mario Cazzola, Department of Hematology Oncology, Fondazione IRCCS Policlinico San Matteo, Pavia, Italy; Department of Molecular Medicine, University of Pavia, Italy. E-mail: [mario.cazzola@unipv.it](mailto:mario.cazzola@unipv.it)

According to the International Committee of Medical Journal Editors (ICMJE) ([http://www.icmje.org/ethical\\_1author.html](http://www.icmje.org/ethical_1author.html)): “Authorship credit should be based on: 1) substantial contributions to conception and design, acquisition of data, or analysis and interpretation of data; 2) drafting the article or revising it critically for important intellectual content; and 3) final approval of the version to be published. Authors should meet conditions 1, 2, and 3 ..... Acquisition of funding, collection of data, or general supervision of the research group alone does not constitute authorship”.

**The guarantors of this manuscript confirm that all persons designated as authors qualify for authorship, and that each author has participated sufficiently in the work to take public responsibility for appropriate portions of the content.**

**2) Authors who participated in the conception of the study:**

- Luca Malcovati, Department of Hematology Oncology, Fondazione IRCCS Policlinico San Matteo, Pavia, Italy; Department of Molecular Medicine, University of Pavia, Italy
- Ilaria Ambaglio, Department of Hematology Oncology, Fondazione IRCCS Policlinico San Matteo, Pavia, Italy
- Dorine W. Swinkels, Department of Laboratory Medicine, Laboratory of Genetic, Endocrine and Metabolic Diseases, Radboud University Nijmegen Medical Center, The Netherlands; [hepcidinanalysis.com](http://hepcidinanalysis.com), Nijmegen, The Netherlands
- Mario Cazzola, Department of Hematology Oncology, Fondazione IRCCS Policlinico San Matteo, Pavia, Italy; Department of Molecular Medicine, University of Pavia, Italy

**3) Design & Methods. The following authors were responsible for specific investigations (please detail):**

- Ilaria Ambaglio, Luca Malcovati, Matteo C. Da Vià, Elisa Bono, Marta Ubezio were responsible for clinical data collection
- Matteo G. Della Porta, Erica Travaglino were responsible for peripheral blood and bone marrow morphological analysis
- Anna Galli, Elli Papaemmanuil, Peter J. Campbell were responsible for mutation analysis
- Coby M. Laarakkers, Riccardo Albertini, Dorine W. Swinkels were responsible for biochemical assays

**4) Results. The following authors were responsible for specific portions of the results, including figures and tables (please indicate the person responsible for each figure and each table):**

- Ilaria Ambaglio, Luca Malcovati, Matteo G. Della Porta, Erica Travaglino, Matteo C. Da Vià, Elisa Bono, Marta Ubezio were responsible for clinical data, including Table 1
- Ilaria Ambaglio, Luca Malcovati, were responsible for Figure 1 and 2
- Anna Gallì, Elli Papaemmanuil, Peter J. Campbell were responsible for mutation analysis results
- Coby M. Laarakkers, Riccardo Albertini, Dorine W. Swinkels were responsible for biochemical analysis results

**5) Writing the manuscript. The following authors were responsible for writing the manuscript:**

- Luca Malcovati, Department of Hematology Oncology, Fondazione IRCCS Policlinico San Matteo, Pavia, Italy; Department of Molecular Medicine, University of Pavia, Italy
- Ilaria Ambaglio, Department of Hematology Oncology, Fondazione IRCCS Policlinico San Matteo, Pavia, Italy
- Dorine W. Swinkels, Department of Laboratory Medicine, Laboratory of Genetic, Endocrine and Metabolic Diseases, Radboud University Nijmegen Medical Center, The Netherlands; Hepcidinanalysis.com, Nijmegen, The Netherlands
- Mario Cazzola, Department of Hematology Oncology, Fondazione IRCCS Policlinico San Matteo, Pavia, Italy; Department of Molecular Medicine, University of Pavia, Italy

**6) Contributors Listed in Acknowledgments: (Examples of those who might be acknowledged include a person who provided purely technical help, writing assistance, or a department chair who provided only general support. Corresponding authors must declare whether they had assistance with the study design, data collection, data analysis, or manuscript preparation. If such assistance was available, the authors must disclose the identity of the individuals who provided this assistance and the entity that supported it. Financial and material support should also be acknowledged.)**

Not applicable
